# Supplementary material for: The dopaminergic reward system underpins gender differences in social preferences
Source: Springer Nature journal article supplement (doi:10.1038/s41562-017-0226-y), 2017-10-05
Supplement: MOESM1 [file 41562_2017_226_MOESM1_ESM.pdf]

In the format provided by the authors and unedited.

# The dopaminergic reward system underpins gender differences in social preferences

Alexander Soutschek <sup>1\*</sup>, Christopher J. Burke<sup>1</sup>, Anjali Raja Beharelle<sup>1</sup>, Robert Schreiber<sup>1</sup>, Susanna C. Weber<sup>1</sup>, Iliana I. Karipidis<sup>1,2,3</sup>, Jolien ten Velden<sup>1,4</sup>, Bernd Weber <sup>5,6</sup>, Helene Haker<sup>7</sup>, Tobias Kalenscher<sup>8</sup> and Philippe N. Tobler<sup>1,3</sup>

---

<sup>1</sup>Laboratory for Social and Neural Systems Research, Department of Economics, University of Zurich, 8006 Zurich, Switzerland. <sup>2</sup>Department of Child and Adolescent Psychiatry and Psychotherapy, Psychiatric Hospital, University of Zurich, 8032 Zurich, Switzerland. <sup>3</sup>Neuroscience Center Zurich, University of Zurich, Swiss Federal Institute of Technology Zurich, 8057 Zurich, Switzerland. <sup>4</sup>Max-Planck-Institute for Psycholinguistics, 6525 XD Nijmegen, Netherlands. <sup>5</sup>Department of Epileptology, University Hospital Bonn, 53105 Bonn, Germany. <sup>6</sup>Center for Economics and Neuroscience, University of Bonn, 53127 Bonn, Germany. <sup>7</sup>Translational Neuromodeling Unit, Institute for Biomedical Engineering, University of Zurich and ETH Zurich, 8032 Zurich, Switzerland. <sup>8</sup>Comparative Psychology, Institute of Experimental Psychology, Heinrich Heine University, 40225 Düsseldorf, Germany.  
\*e-mail: [alexander.soutschek@econ.uzh.ch](mailto:alexander.soutschek@econ.uzh.ch)

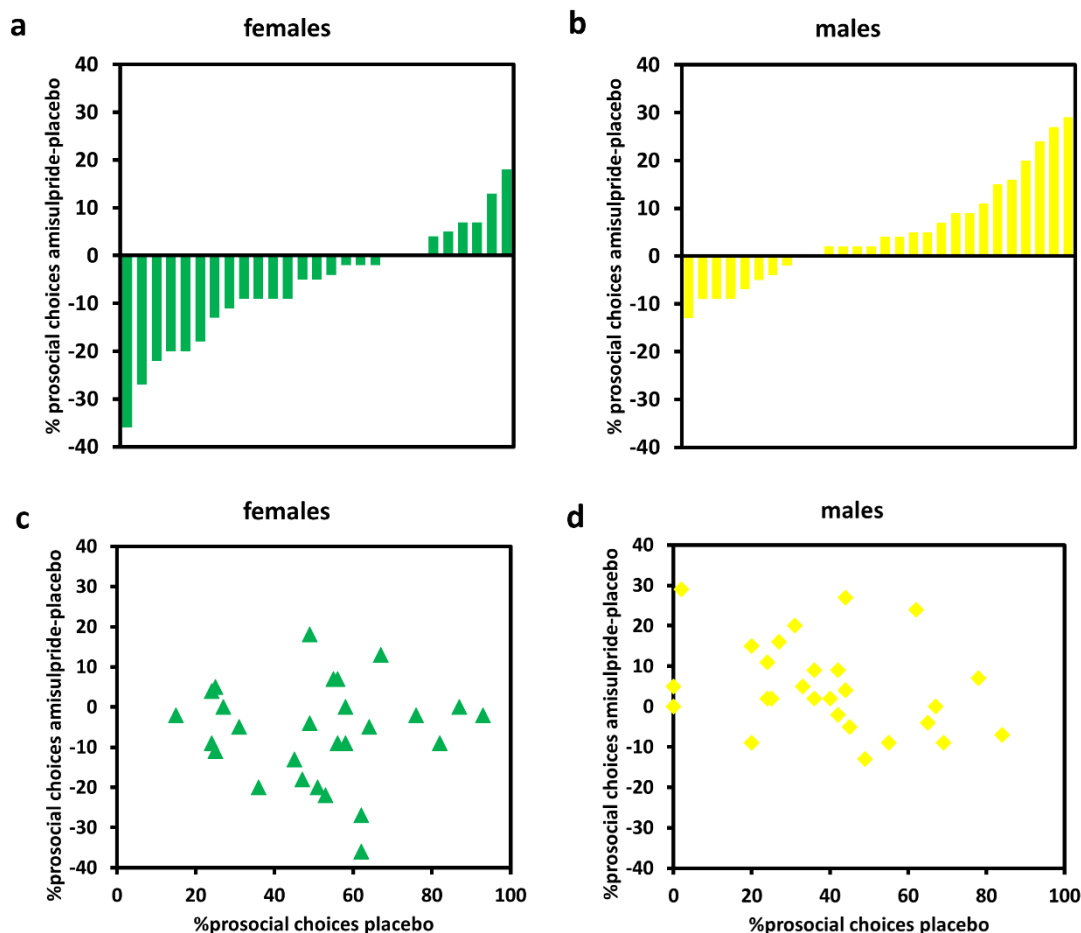

*Supplementary Figure 1.* Individual differences. Amisulpride effects on percentage of prosocial choices relative to placebo, plotted separately for (a) female and (b) male participants. While most female participants became more selfish under amisulpride relative to placebo, the majority of male participants was biased towards more prosocial choices after drug administration. (c, d) plot this difference as a function of prosocial decisions in the (baseline) placebo condition. There was no evidence for a significant relationship between baseline prosociality and drug effects within the samples of female,  $r = -0.025$ ,  $p = 0.902$ , and male,  $r = -0.320$ ,  $p = 0.097$ , participants. These findings suggest that between-gender differences are more sensitive to dopaminergic intervention than within-gender differences.



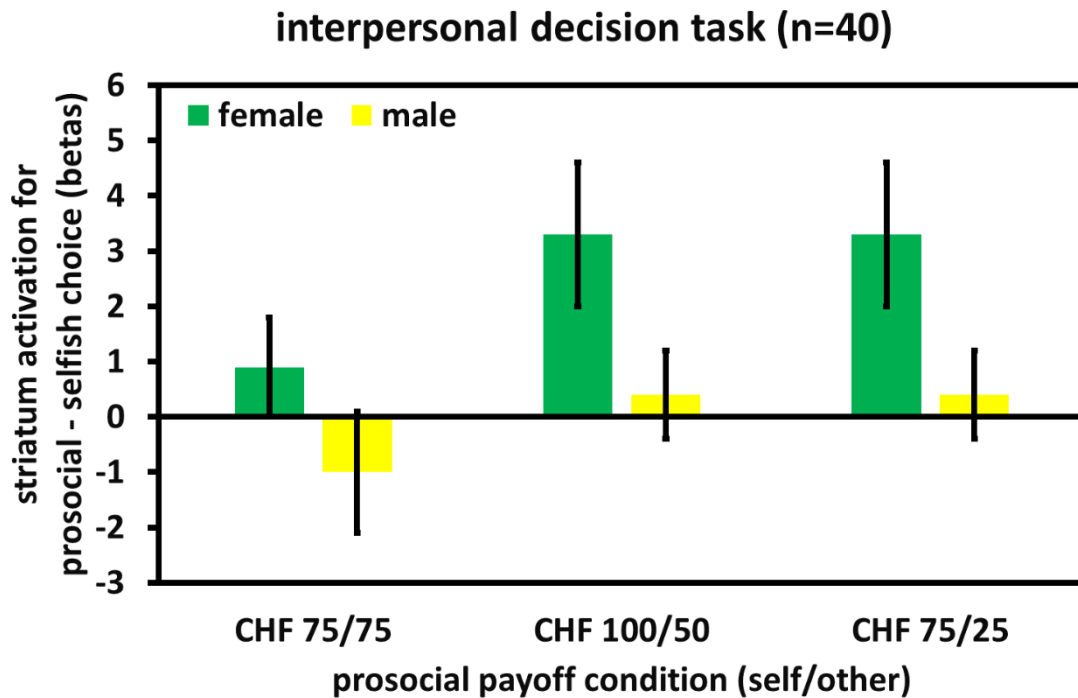

*Supplementary Figure 3.* Activation for the prosocial – selfish decision contrast from the striatum region of interest in neuroimaging experiment 2, plotted as a function of gender (female vs. male) and payoff for the prosocial reward option in the interpersonal decision task (CHF 75 for self/CHF 75 for other vs. CHF 100 for self/CHF 50 for other vs. CHF 75 for self/CHF 25 for other). The observed gender difference in striatal activation during social decisions was independent of the payoff structure of the prosocial reward option, as indicated by a non-significant interaction between gender and prosocial payoff,  $F(2, 30) < 1, p = 0.81, \eta_p^2 = 0.014$ . Error bars indicate standard error of the mean.
